# Supplementary material for: Long-Term Breast Cancer Outcomes of Pregnancy-Associated Breast Cancer (PABC) in a Prospective Cohort
Source: MDPI journal article supplement (doi:10.3390/cancers14194839), 2022-10-04
Supplement: s1 [file s1]

**Supplementary Table S1.** Receptor status and treatments in the metastatic setting ( $n = 42$ )

| Characteristics                                    | PABC group<br>( $n = 11$ ) | Non-PABC group<br>( $n = 31$ ) | <i>P</i> value |
|----------------------------------------------------|----------------------------|--------------------------------|----------------|
| Receptor status                                    |                            |                                |                |
| HR+/HER2-                                          | 4 (36.3)                   | 15 (48.4)                      | 0.665*         |
| HR+/HER2+                                          | 3 (27.3)                   | 5 (16.1)                       |                |
| HR-/HER2+                                          | 0                          | 3 (9.7)                        |                |
| Triple negative                                    | 4 (36.4)                   | 8 (25.8)                       |                |
| Metastatic sites number                            | 3 (2-4)                    | 3 (1-4)                        | 0.527          |
| Progression during<br>neoadjuvant chemotherapy     | 2 (18.2)                   | 8 (25.8)                       | 0.999*         |
| Breast surgery in metastatic<br>setting            | 1 (9.1)                    | 2 (6.5)                        | 0.999*         |
| First line initial response to<br>systemic therapy |                            |                                |                |
| Complete response                                  | 1 (9.1)                    | 0                              | 0.396*         |
| Partial response                                   | 2 (18.2)                   | 7 (22.6)                       |                |
| Stable disease                                     | 0                          | 1 (3.2)                        |                |
| Progressive disease                                | 8 (72.7)                   | 23 (74.2)                      |                |

Data are shown as n (%) per each group or median (range).

\* *P* value was calculated from the Fisher's exact test.

PABC, pregnancy-associated breast cancer; HR, hormone receptor; HER2, human epidermal growth factor receptor 2.

**Supplementary Table S2.** Subgroup analysis of the PABC group (*n* = 93)

| Characteristics                            | Diagnosed during pregnancy<br>( <i>n</i> = 28) | Diagnosed within 1-year postpartum<br>( <i>n</i> = 65) | <i>P</i> value |
|--------------------------------------------|------------------------------------------------|--------------------------------------------------------|----------------|
| Age at diagnosis (years)                   | 33 (28-43)                                     | 35 (26-43)                                             | 0.523          |
| Gestational weeks at diagnosis             | 20 (4-38)                                      | -                                                      |                |
| First trimester                            | 9 (32.1)                                       | -                                                      |                |
| Second trimester                           | 12 (42.9)                                      | -                                                      |                |
| Third trimester                            | 7 (25.0)                                       | -                                                      |                |
| Gestational weeks at delivery <sup>a</sup> | 37 (30-40)                                     | -                                                      |                |
| Termination of pregnancy                   | 5 (17.9)                                       | -                                                      |                |
| Postpartum months at diagnosis             | -                                              | 6 (0.25-12)                                            |                |
| Receptor status                            |                                                |                                                        |                |
| HR+/HER2-                                  | 14 (50.0)                                      | 28 (43.1)                                              | 0.261*         |
| HR+/HER2+                                  | 8 (28.6)                                       | 10 (15.4)                                              |                |
| HR-/HER2+                                  | 1 (3.6)                                        | 6 (9.2)                                                |                |
| Triple negative                            | 5 (17.9)                                       | 21 (32.3)                                              |                |
| Treatment setting                          |                                                |                                                        |                |
| Neoadjuvant                                | 13 (46.4)                                      | 36 (55.4)                                              | 0.685          |
| Adjuvant                                   | 11 (39.3)                                      | 22 (33.8)                                              |                |
| Palliative                                 | 4 (10.7)                                       | 7 (10.8)                                               |                |
| Neoadjuvant chemotherapy                   |                                                |                                                        |                |
| AC                                         | 7 (53.8)                                       | -                                                      |                |
| AC + docetaxel                             | 6 (46.2)                                       | 20 (55.6)                                              |                |
| AC + docetaxel + platinum                  | -                                              | 1 (2.8)                                                |                |
| AC + docetaxel + trastuzumab               | -                                              | 8 (22.2)                                               |                |
| TCHP                                       | -                                              | 4 (11.1)                                               |                |
| Others                                     | -                                              | 3 (8.3)                                                |                |
| pCR                                        | 2 (7.1)                                        | 12 (18.5)                                              | 0.215          |
| Adjuvant chemotherapy                      | 15 (53.6)                                      | 26 (40.0)                                              | 0.260          |
| Adjuvant trastuzumab                       | 6 (21.4)                                       | 14 (21.5)                                              | 0.999          |
| Adjuvant endocrine therapy                 | 17 (60.7)                                      | 38 (58.5)                                              | 0.650          |
| Adjuvant radiotherapy                      | 18 (64.3)                                      | 42 (64.6)                                              | 0.816          |

Data are shown as n (%) per each group or median (range).

\* *P* value was calculated from the Fisher's exact test.

<sup>a</sup> Data are from 23 patients excluding 5 patients who terminated pregnancies.

PABC, pregnancy-associated breast cancer; HR, hormone receptor; HER2, human epidermal growth factor receptor 2; AC, anthracycline and cyclophosphamide; TCHP, docetaxel, carboplatin, trastuzumab and pertuzumab; pCR, pathological complete response.

**Supplementary Figure S1.** Study design.

YBC, young breast cancer; PABC, pregnancy-associated breast cancer.

**Supplementary Figure S2.** Kaplan-Meier curves of survival of the PABC group. (A) Disease-free survival. (B) Overall survival.

PABC, pregnancy-associated breast cancer.
